# Supplementary material for: Human immunoglobulin G hinge regulates agonistic anti-CD40 immunostimulatory and antitumour activities through biophysical flexibility
Source: PubMed Central journal article supplement (PMC6765011; doi:10.1038/s41467-019-12097-6), 2019-09-27
Supplement: 41467_2019_12097_MOESM3_ESM.pdf [file 41467_2019_12097_MOESM3_ESM.pdf]

## Reporting Summary

Nature Research wishes to improve the reproducibility of the work that we publish. This form provides structure for consistency and transparency in reporting. For further information on Nature Research policies, see [Authors & Referees](#) and the [Editorial Policy Checklist](#).

### Statistical parameters

When statistical analyses are reported, confirm that the following items are present in the relevant location (e.g. figure legend, table legend, main text, or Methods section).

n/a Confirmed

- The exact sample size ( $n$ ) for each experimental group/condition, given as a discrete number and unit of measurement
- An indication of whether measurements were taken from distinct samples or whether the same sample was measured repeatedly
- The statistical test(s) used AND whether they are one- or two-sided  
*Only common tests should be described solely by name; describe more complex techniques in the Methods section.*
- A description of all covariates tested
- A description of any assumptions or corrections, such as tests of normality and adjustment for multiple comparisons
- A full description of the statistics including central tendency (e.g. means) or other basic estimates (e.g. regression coefficient) AND variation (e.g. standard deviation) or associated estimates of uncertainty (e.g. confidence intervals)
- For null hypothesis testing, the test statistic (e.g.  $F$ ,  $t$ ,  $r$ ) with confidence intervals, effect sizes, degrees of freedom and  $P$  value noted  
*Give  $P$  values as exact values whenever suitable.*
- For Bayesian analysis, information on the choice of priors and Markov chain Monte Carlo settings
- For hierarchical and complex designs, identification of the appropriate level for tests and full reporting of outcomes
- Estimates of effect sizes (e.g. Cohen's  $d$ , Pearson's  $r$ ), indicating how they were calculated
- Clearly defined error bars  
*State explicitly what error bars represent (e.g. SD, SE, CI)*

Our web collection on [statistics for biologists](#) may be useful.

### Software and code

Policy information about [availability of computer code](#)

Data collection

BD FACSDiva Software

Data analysis

Flowjo X (Version 10.0.7r2); Prism 6 for Windows (version 6.01); BioXTAS RAW (Version 1.2.1); the ATSAS program suite (Version 2.8.4); The PyMOL Molecular Graphic System (version 1.7.2.1, Schrodinger LLC.); The SWISS-MODEL Workspace

For manuscripts utilizing custom algorithms or software that are central to the research but not yet described in published literature, software must be made available to editors/reviewers upon request. We strongly encourage code deposition in a community repository (e.g. GitHub). See the Nature Research [guidelines for submitting code & software](#) for further information.

### Data

Policy information about [availability of data](#)

All manuscripts must include a [data availability statement](#). This statement should provide the following information, where applicable:

- Accession codes, unique identifiers, or web links for publicly available datasets
- A list of figures that have associated raw data
- A description of any restrictions on data availability

All data generated or analyzed during this study are either included in this manuscript (Figures and supplementary information) or available upon reasonable request. A section titled "Data Availability" is included in the manuscript after the Methods section and before the References.

## Field-specific reporting

Please select the best fit for your research. If you are not sure, read the appropriate sections before making your selection.

Life sciences       Behavioural & social sciences       Ecological, evolutionary & environmental sciences

For a reference copy of the document with all sections, see [nature.com/authors/policies/ReportingSummary-flat.pdf](https://www.nature.com/authors/policies/ReportingSummary-flat.pdf)

## Life sciences study design

All studies must disclose on these points even when the disclosure is negative.

|                 |                                                                                                                                                                                                                                                                                            |
|-----------------|--------------------------------------------------------------------------------------------------------------------------------------------------------------------------------------------------------------------------------------------------------------------------------------------|
| Sample size     | No statistical method was used to predetermine sample sizes. For most in vivo studies, sample sizes that are more than 3 were chosen to overcome individual variation as in common practice. These sample sizes are sufficient because significant differences were consistently observed. |
| Data exclusions | No data were excluded.                                                                                                                                                                                                                                                                     |
| Replication     | Reproducibility of the experimental findings were verified by repeated experiments (all major conclusions were supported by at least two independent experiments). All attempts at replication were successful.                                                                            |
| Randomization   | Mice were randomly allocated into different groups.                                                                                                                                                                                                                                        |
| Blinding        | Investigators were blinded to group allocation during data analysis.                                                                                                                                                                                                                       |

## Reporting for specific materials, systems and methods

### Materials & experimental systems

|                                     |                                                                 |
|-------------------------------------|-----------------------------------------------------------------|
| n/a                                 | Included in the study                                           |
| <input checked="" type="checkbox"/> | <input type="checkbox"/> Unique biological materials            |
| <input type="checkbox"/>            | <input checked="" type="checkbox"/> Antibodies                  |
| <input type="checkbox"/>            | <input checked="" type="checkbox"/> Eukaryotic cell lines       |
| <input checked="" type="checkbox"/> | <input type="checkbox"/> Palaeontology                          |
| <input type="checkbox"/>            | <input checked="" type="checkbox"/> Animals and other organisms |
| <input checked="" type="checkbox"/> | <input type="checkbox"/> Human research participants            |

### Methods

|                                     |                                                    |
|-------------------------------------|----------------------------------------------------|
| n/a                                 | Included in the study                              |
| <input checked="" type="checkbox"/> | <input type="checkbox"/> ChIP-seq                  |
| <input type="checkbox"/>            | <input checked="" type="checkbox"/> Flow cytometry |
| <input checked="" type="checkbox"/> | <input type="checkbox"/> MRI-based neuroimaging    |

## Antibodies

|                 |                                                                                                                                                                              |
|-----------------|------------------------------------------------------------------------------------------------------------------------------------------------------------------------------|
| Antibodies used | All antibodies used in the study were described in the "Methods" section of the Supplementary Materials.                                                                     |
| Validation      | All antibodies used (commercially obtained or made in house) were validated either by manufacturers, others in cited references, or by the presented data in the manuscript. |

## Eukaryotic cell lines

Policy information about [cell lines](#)

|                                                                      |                                                                                      |
|----------------------------------------------------------------------|--------------------------------------------------------------------------------------|
| Cell line source(s)                                                  | MC38 and MO4 cells are provided by Dr. Jeffrey Ravetch at the Rockefeller University |
| Authentication                                                       | None of the cell lines used were authenticated.                                      |
| Mycoplasma contamination                                             | None of the cell lines were tested for mycoplasma contamination.                     |
| Commonly misidentified lines<br>(See <a href="#">ICLAC</a> register) | N/A                                                                                  |

## Animals and other organisms

Policy information about [studies involving animals](#); [ARRIVE guidelines](#) recommended for reporting animal research

|                         |                                                                                                   |
|-------------------------|---------------------------------------------------------------------------------------------------|
| Laboratory animals      | All mice used in the study were described in the "Methods" section of the Supplementary Materials |
| Wild animals            | N/A                                                                                               |
| Field-collected samples | N/A                                                                                               |

## Flow Cytometry

### Plots

Confirm that:

- The axis labels state the marker and fluorochrome used (e.g. CD4-FITC).
- The axis scales are clearly visible. Include numbers along axes only for bottom left plot of group (a 'group' is an analysis of identical markers).
- All plots are contour plots with outliers or pseudocolor plots.
- A numerical value for number of cells or percentage (with statistics) is provided.

### Methodology

|                           |                                                                                                                         |
|---------------------------|-------------------------------------------------------------------------------------------------------------------------|
| Sample preparation        | Method to perform flow cytometry is described in the "Flow cytometry" part of the "Methods" section.                    |
| Instrument                | BD LSRFortessa™ X-20 analyzer (BD Biosciences), BD FACSCanto II (BD Biosciences), BD FACSCalibur (BD Biosciences).      |
| Software                  | BD FACSDiva Software, Flowjo X (Version 10.0.7r2).                                                                      |
| Cell population abundance | N/A                                                                                                                     |
| Gating strategy           | Information for gating strategy is described in Supplementary Fig. 8, and the relevant "Results" and "Methods" section. |

Tick this box to confirm that a figure exemplifying the gating strategy is provided in the Supplementary Information.
